# Supplementary material
Source: PubMed Central journal article supplement (PMC3056575)
Supplement: supp_jn.110.131904_nut131904_F01.pdf [file supp_jn.110.131904_nut131904_F01.pdf]

Online Supporting Material

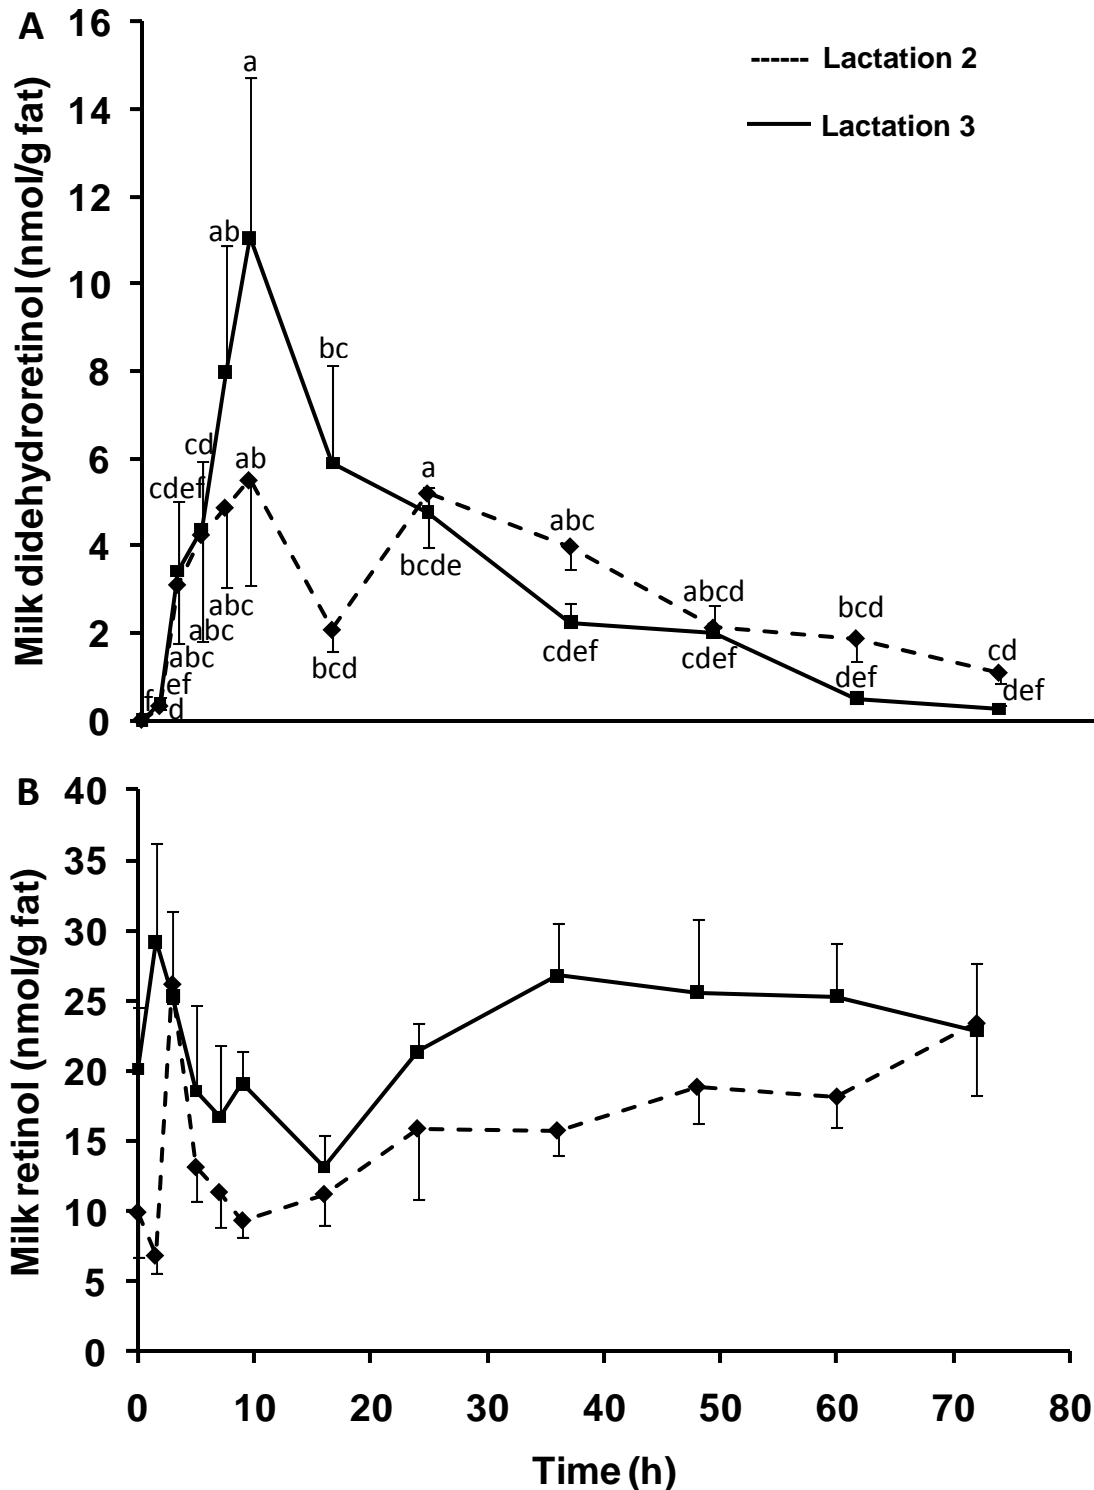

**Supplemental Figure 1.** Milk 3, 4-didehydroretinol (DR) (panel A) and retinol (R) (panel B) per g fat in lactating sows after administration of 35  $\mu$ mol 3, 4-didehydroretinyl acetate. Sows were fed vitamin A-free feed for 2 ( $n = 8$ ) or 3 ( $n = 7$ ) lactation cycles. A significant difference for time was found in milk DR/g fat ( $P < 0.0001$ ) and R/g fat ( $P = 0.036$ ). DR/g fat changed during each lactation ( $P < 0.05$ ). Milk R/g fat changed marginally during lactation 2 and 3 ( $P = 0.07$  and  $0.09$ , respectively). Values are means  $\pm$  SEM. Means without a common letter differ within a curve,  $P < 0.05$  (Repeated Measures' ANOVA with fixed effects followed by LSM differences).
